# Supplementary material for: Co-aggregation of α-synuclein with amyloid-β stabilizes β-sheet-rich oligomers and enhances the formation of β-barrels
Source: Royal Society of Chemistry journal article supplement (doi:10.1039/d3cp04138g), 2023-01-01
Supplement: d3cp04138g1.pdf [file d3cp04138g1.pdf]

## Supplementary Information

### Co-aggregation of $\alpha$ -synuclein with Amyloid- $\beta$ Stabilizes $\beta$ -sheet-rich Oligomers and Enhances the Formation of $\beta$ -barrels

Fengjuan Huang<sup>1‡</sup>, Yuying Liu<sup>2‡</sup>, Ying Wang<sup>2</sup>, Jia Xu<sup>3</sup>, Jiangfang Lian<sup>1</sup>, Yu Zou<sup>4</sup>,  
Chuang Wang<sup>3\*</sup>, Feng Ding<sup>5\*</sup>, Yunxiang Sun<sup>2,5\*</sup>

1. Ningbo Institute of Innovation for Combined Medicine and Engineering (NIIME), Ningbo Medical Center Lihuili Hospital, Ningbo 315211, China
2. School of Physical Science and Technology, Ningbo University, Ningbo 315211, China
3. School of Medicine, Ningbo University, Ningbo 315211, China
4. Department of Sport and Exercise Science, Zhejiang University, Hangzhou 310058, China
5. Department of Physics and Astronomy, Clemson University, Clemson, SC 29634, United States

‡ These authors contributed equally to this work.

\*E-mail: [wangchuang@nbu.edu.cn](mailto:wangchuang@nbu.edu.cn), [fding@clemson.edu](mailto:fding@clemson.edu), [sunyunxiang@nbu.edu.cn](mailto:sunyunxiang@nbu.edu.cn)

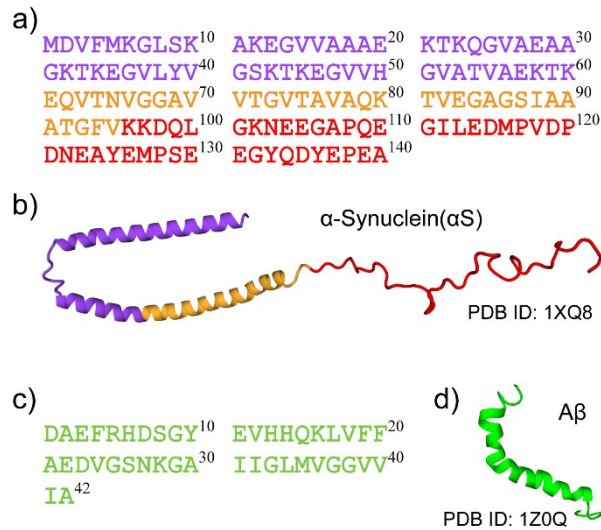

**Fig. S1. Amino acid sequence and initial structure of  $\alpha$ S and A $\beta$ .** The primary sequence and initial structure of full-length  $\alpha$ S **a&c)** and A $\beta$  **b&d)** used in our DMD simulation. The N-terminus, NAC region, and C-terminus of  $\alpha$ S are colored purple, orange, and red, respectively. The A $\beta$  peptide is colored green.

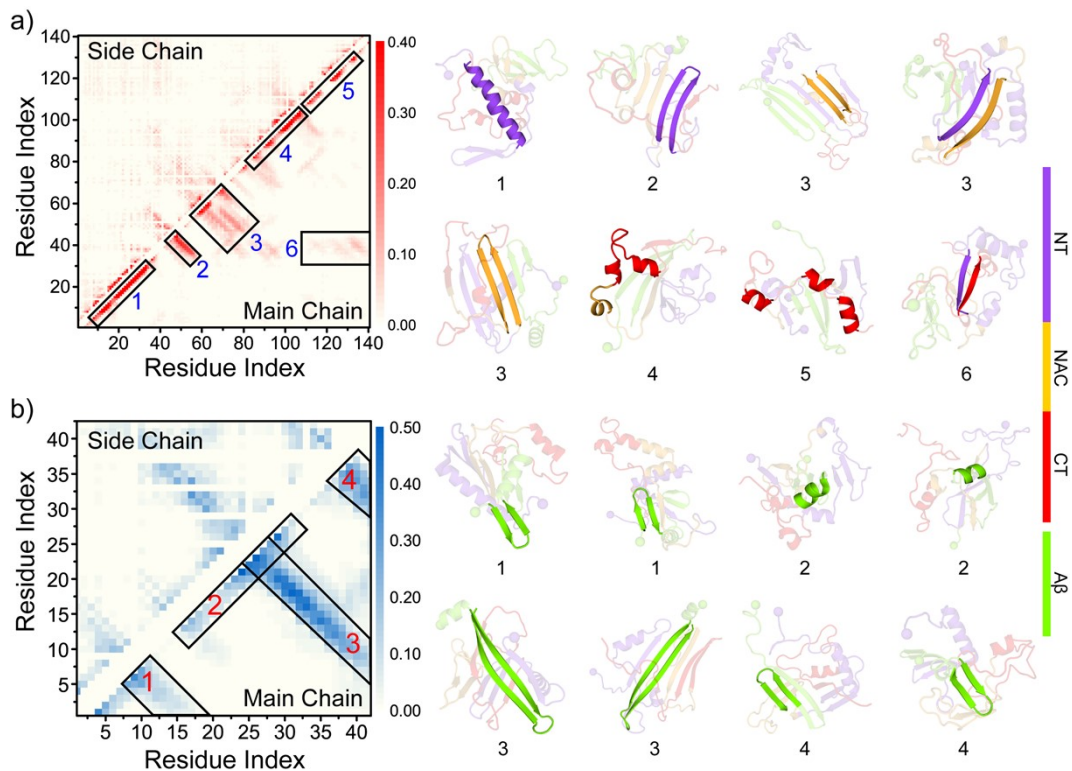

**Fig. S2. Intra-peptide contact frequency analysis of  $\alpha$ S and A $\beta$  in their hetero-dimer.** The intra-peptide residue-pairwise contact frequencies formed by atoms from main-chain (lower diagonal) and side-chain (upper diagonal) atoms of  $\alpha$ S **a)** and A $\beta$  **b)** in the hetero-dimer from the last 100 ns of 30 independent 500 ns hetero-dimerization DMD simulations of one  $\alpha$ S monomer mixed with one A $\beta$ . The representative structured motifs with high contact frequency patterns, heightened by boxes in the contact frequency map, are also presented on the right.

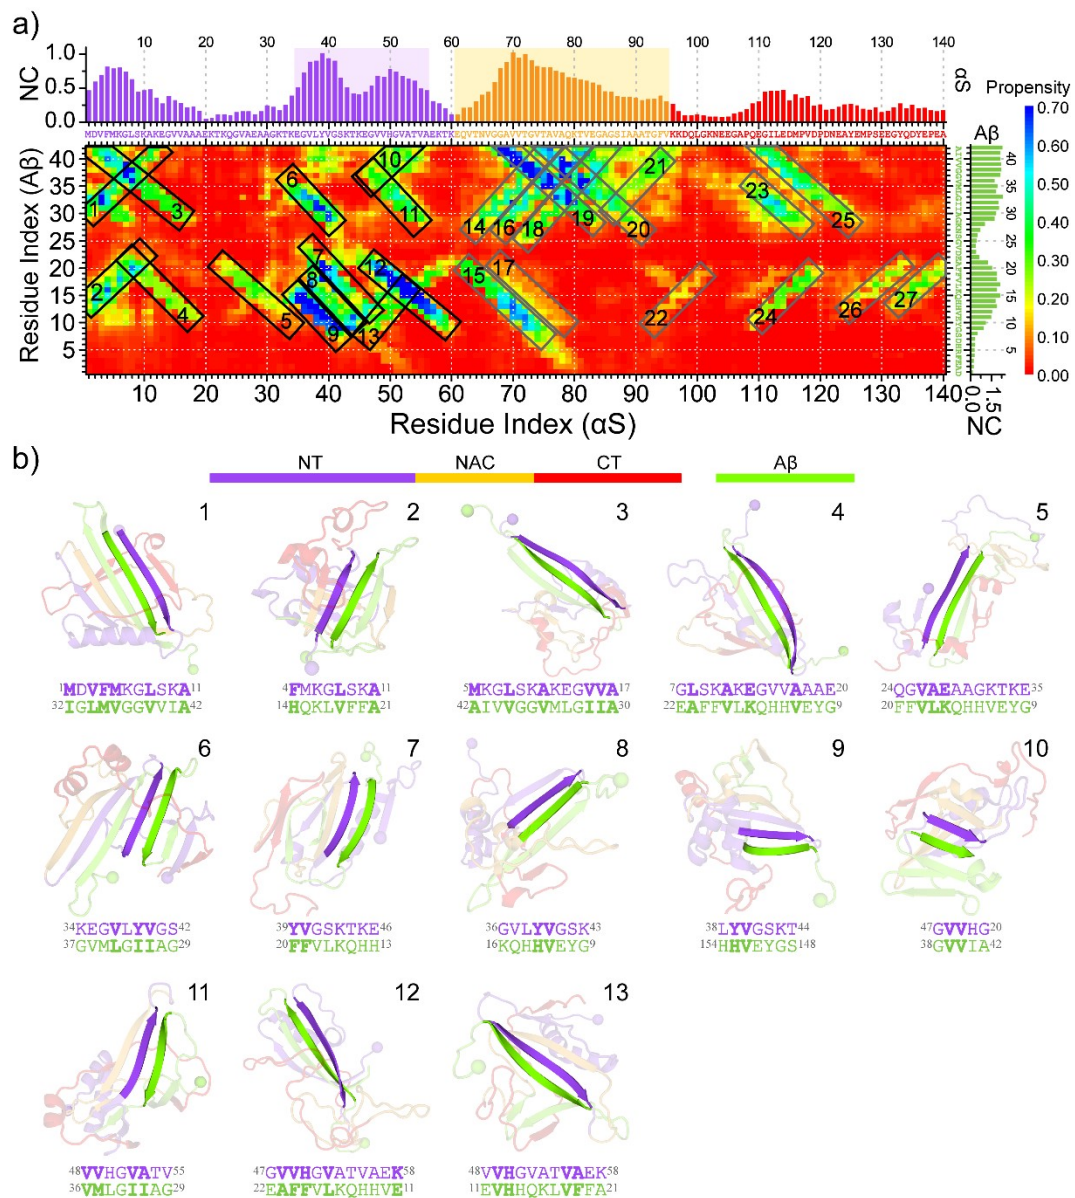

**Fig. S3. Conformational interaction between the N-terminus of  $\alpha$ S and A $\beta$  in the heterodimer. a)** The inter-peptide residue-pairwise contact formed among main-chain atoms of  $\alpha$ S and A $\beta$  during the last 100 ns of 30 independent 500 ns simulations. **b)** Representative contact pattern structures of the A $\beta$  monomer (green) and N-terminal region of  $\alpha$ S (purple) labeled as 1-13 heightened by boxes in the contact frequency map are also presented.

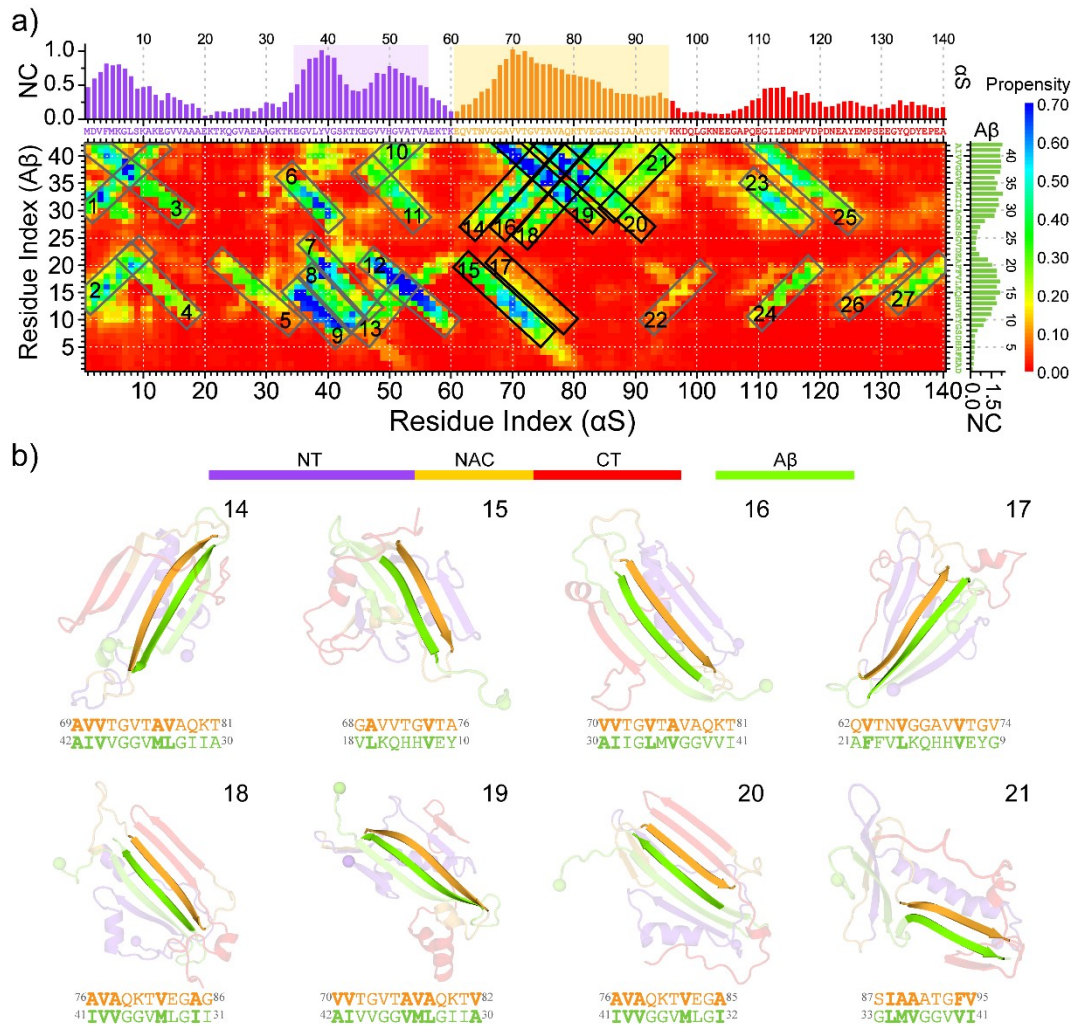

**Fig. S4. Conformational interaction between the NAC region of  $\alpha\text{S}$  and  $\text{A}\beta$  in the heterodimer. a)** The inter-peptide residue-pairwise contact formed among main-chain atoms of  $\alpha\text{S}$  and  $\text{A}\beta$  during the last 100 ns of 30 independent 500 ns simulations. **b)** Representative contact pattern structures of the  $\text{A}\beta$  monomer (green) and NAC region of  $\alpha\text{S}$  (orange) labeled as 14-21 heightened by boxes in the contact frequency map are also presented.



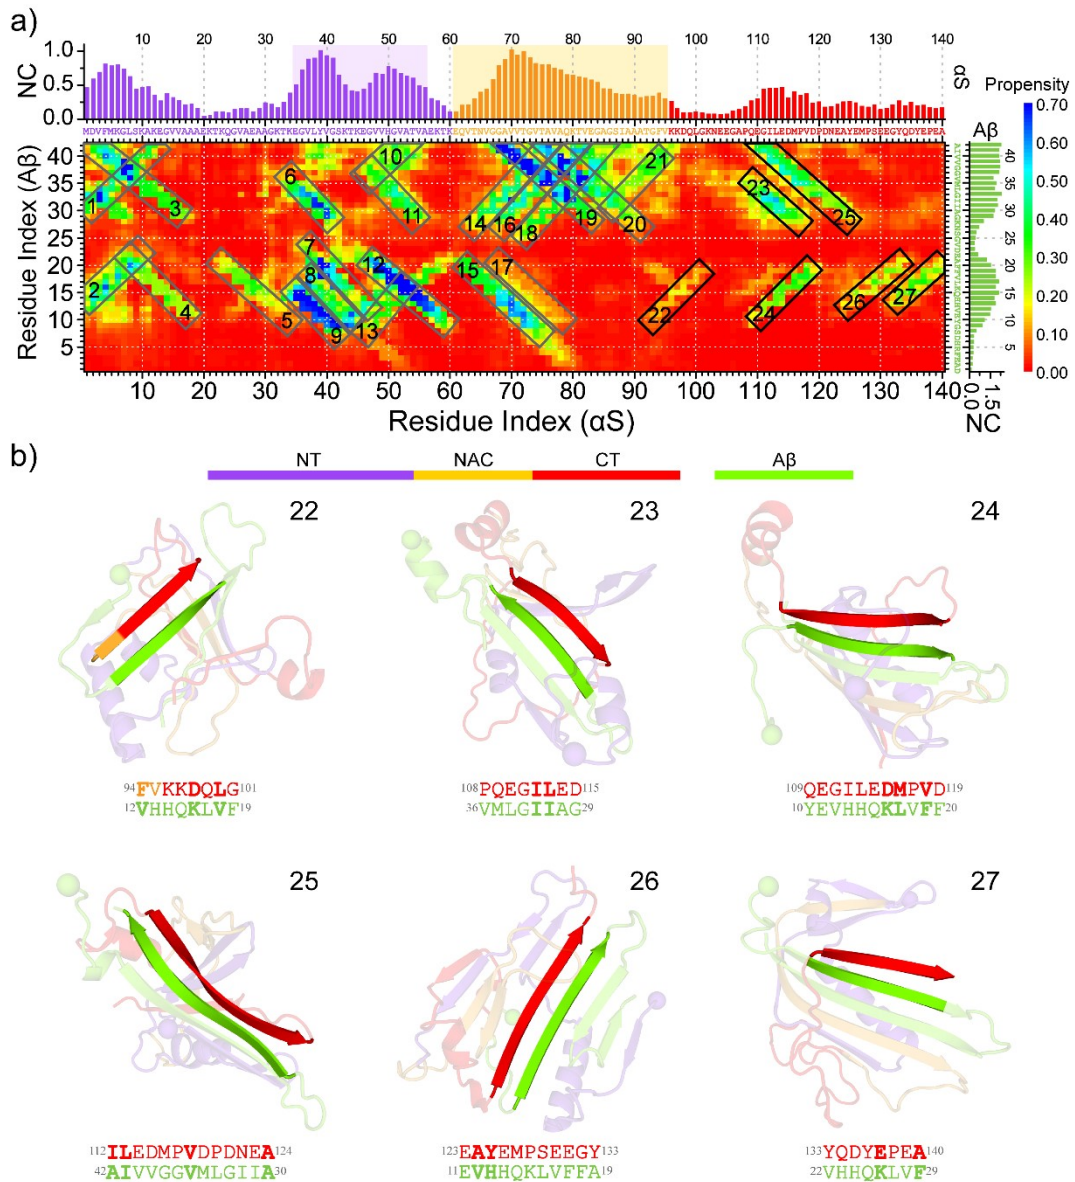

**Fig. S5. Conformational interaction between the C-terminus of  $\alpha$ S and A $\beta$  in the heterodimer. a)** The inter-peptide residue-pairwise contact formed among main-chain atoms of  $\alpha$ S and A $\beta$  during the last 100 ns of 30 independent 500 ns simulations. **b)** Representative contact pattern structures of the A $\beta$  monomer (green) and C-terminus of  $\alpha$ S (red) labeled as 22-27 heightened by boxes in the contact frequency map are also presented.

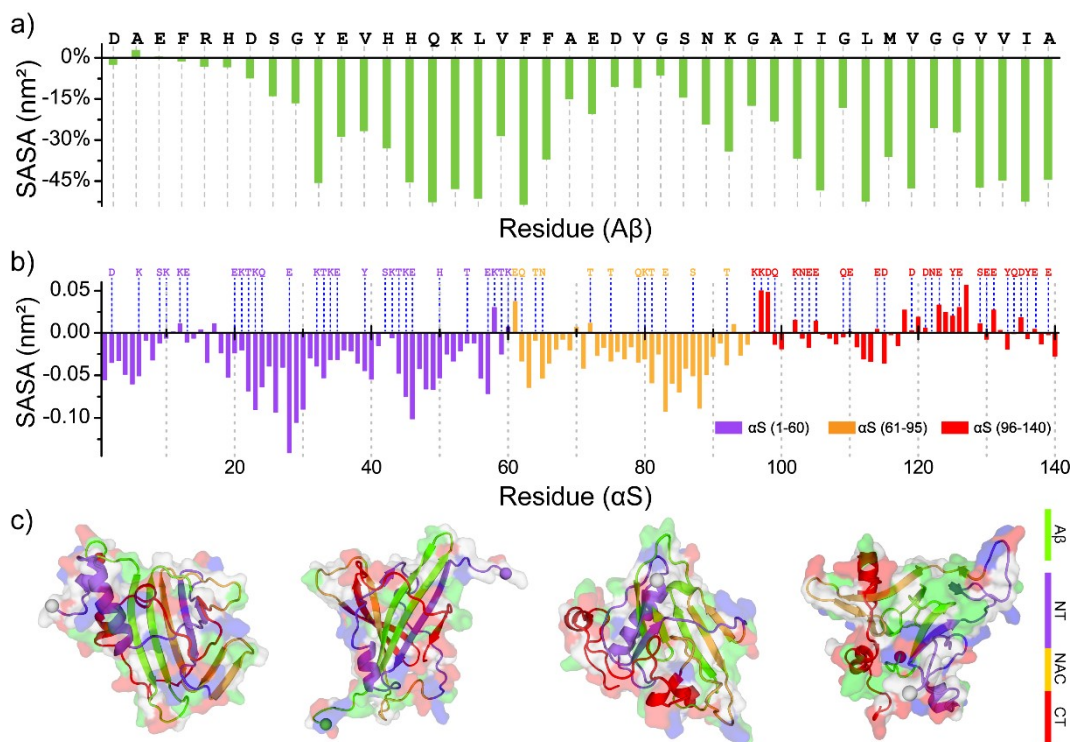

**Fig. S6. Exposed surface area analysis for each residue from A $\beta$  and  $\alpha$ S hetero-dimer.** **a&b)** Average difference ratios of the accessible surface area per residue from A $\beta$  and  $\alpha$ S in the hetero-dimer compared with their isolated monomer. **c)** The four representative structures are shown in the cartoon and surface by residue type (hydrophobic, polar, negatively charged, and positively charged residues are colored white, green, red, and blue, respectively). Only the conformations of the isolated monomer of A $\beta$ ,  $\alpha$ S, and hetero-dimer of A $\beta$  and  $\alpha$ S in the last 100 ns are used for the above analysis. For each molecular system (including one A $\beta$ , one  $\alpha$ S, and one A $\beta$  mixed with one  $\alpha$ S), we performed 30 independent 500 ns DMD trajectories.

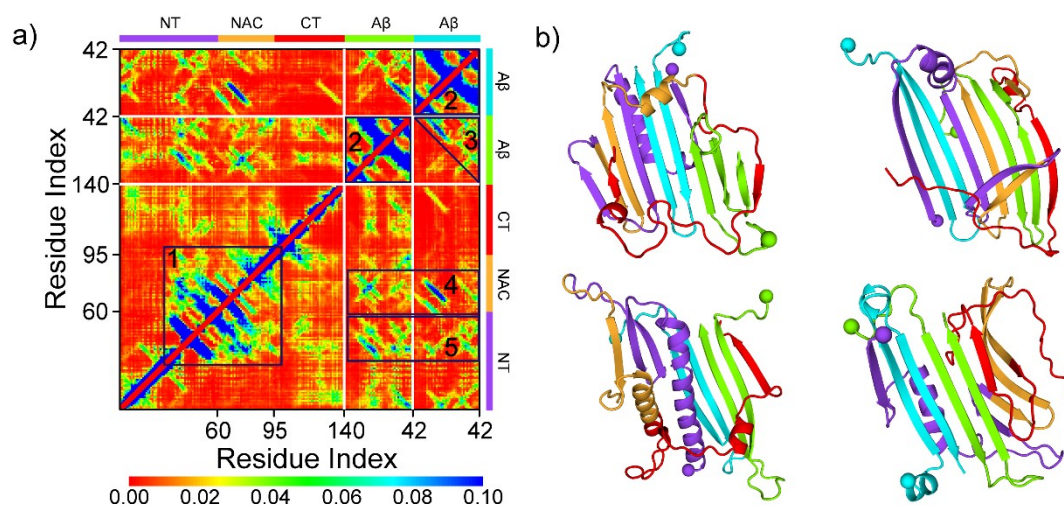

**Fig. S7. Residues-pairwise contact analysis in the hetero-trimer formed by two A $\beta$  and one  $\alpha$ S.** **a)** The frequency of residue-residue contact formed by heavy atoms of each residue from  $\alpha$ S and A $\beta$  in their hetero-trimer. Four representative snapshots featured with typical  $\beta$ -sheet patterns labeled 1-5 in **a)** are also shown in **b)**. Only the last 100 ns data from 30 independent DMD trajectories are used for the above analysis.

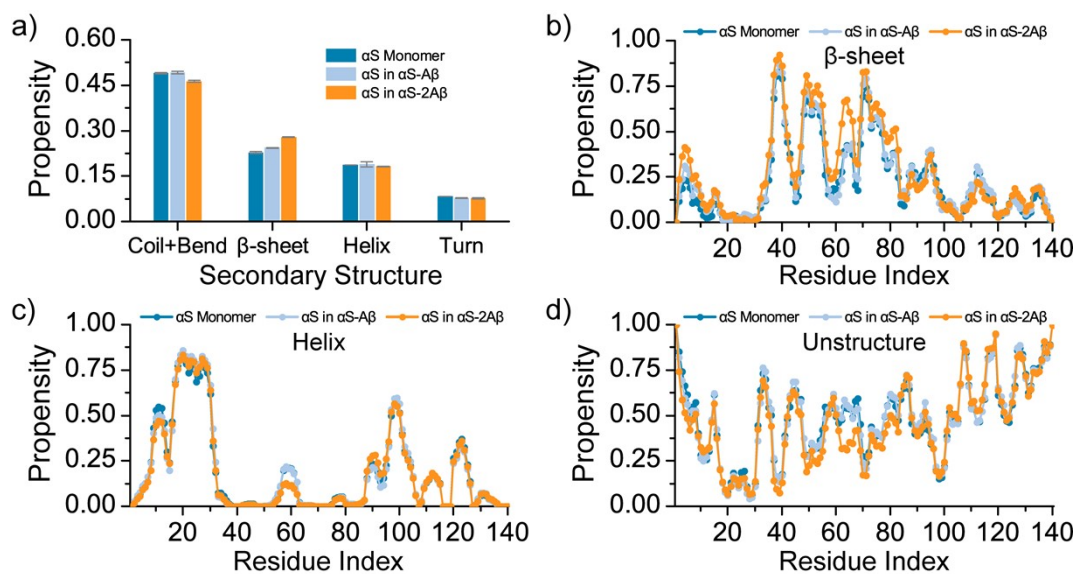

**Fig. S8. Secondary structural analysis of  $\alpha$ S monomer in the absence and presence of A $\beta$  peptide.** The average secondary structure propensity of  $\alpha$ S monomer in the absence and presence of A $\beta$  peptides a). The average tendency of each residue from  $\alpha$ S monomer adopts  $\beta$ -sheet b), helix c), and unstructured d) formations in the absence and presence of A $\beta$  peptides.
